# Supplementary material for: Targeted Allelic Expression Profiling in Human Islets Identifies cis-Regulatory Effects for Multiple Variants Identified by Type 2 Diabetes Genome-Wide Association Studies
Source: Oxford University Press journal article supplement (doi:10.2337/db14-0957), 2014-11-12
Supplement: db140957supplementarydata.pdf [file db140957supplementarydata.pdf]

SUPPLEMENTARY DATA

**Supplementary Table 1.** Islet donor characteristics

|                             |            |
|-----------------------------|------------|
| Donor age                   | 48 (19-64) |
| BMI                         | 27 (21-37) |
| Sex (M/F)                   | 21/15      |
| Cold ischaemic time (hours) | 15 (3-25)  |
| Islet purity (%)            | 90 (75-95) |
| Islet viability (%)         | 92 (80-96) |

Data presented as median (range). All white non-diabetic donors.

SUPPLEMENTARY DATA

**Supplementary Table 2.** TaqMan primer/probe sequences  
Allelic expression analysis

| Transcribed SNP | Assay type | Assay ID      | Forward primer sequence       | Reverse Primer sequence      | FAM probe sequence     | VIC probe sequence      |
|-----------------|------------|---------------|-------------------------------|------------------------------|------------------------|-------------------------|
| rs699779        | I          | C_27079518_10 | N/A                           | N/A                          | N/A                    | N/A                     |
| rs5219          | I          | C_11654065_10 | N/A                           | N/A                          | N/A                    | N/A                     |
| rs17240240      | I          | C_25605130_10 | N/A                           | N/A                          | N/A                    | N/A                     |
| rs11558471      | I          | C_32657961_20 | N/A                           | N/A                          | N/A                    | N/A                     |
| rs1046320       | I          | C_2873369_10  | N/A                           | N/A                          | N/A                    | N/A                     |
| rs55834942      | I          | C_89163791_10 | N/A                           | N/A                          | N/A                    | N/A                     |
| rs750625        | I          | C_10008773_10 | N/A                           | N/A                          | N/A                    | N/A                     |
| rs11603334      | I          | C_1953904_10  | N/A                           | N/A                          | N/A                    | N/A                     |
| rs11024271      | I          | C_2991129_20  | N/A                           | N/A                          | N/A                    | N/A                     |
| rs835575        | I          | C_8689324_10  | N/A                           | N/A                          | N/A                    | N/A                     |
| rs5215          | I          | C_2991148_10  | N/A                           | N/A                          | N/A                    | N/A                     |
| rs1801206       | I          | C_8841070_10  | N/A                           | N/A                          | N/A                    | N/A                     |
| rs3802177       | I          | C_357887_10   | N/A                           | N/A                          | N/A                    | N/A                     |
| rs1801282       | I          | C_1129864_10  | N/A                           | N/A                          | N/A                    | N/A                     |
| rs7377          | I          | C_7480381_10  | N/A                           | N/A                          | N/A                    | N/A                     |
| rs2793823       | I          | C_25641062_10 | N/A                           | N/A                          | N/A                    | N/A                     |
| rs1065359       | C          | N/A           | CCGCGACGGCAAGTG               | CTTCACTGCAGCG<br>GG          | AGTGCACATTCT<br>GC     | AAGTGCACGTTCT<br>GC     |
| rs7578597       | C          | N/A           | GAACCAAAGAAAGGC<br>AGAATGGATT | GTAGGCCAGCCA<br>AAGAGATTAA   | CTTTCATTGCTAT<br>TTTC  | CTCTTTCATTGTTA<br>TTTTC |
| rs72999033      | C          | N/A           | GAGGCAGAATTCAAA<br>CCCAAACC   | CCTCTTACTGTCA<br>CGTCATCTCT  | TGGTCCCAAAT<br>TCAGAG  | CTGGTCCCAAAC<br>TCAGAG  |
| rs13337017      | C          | N/A           | CTGCCTGCCTGCATTG<br>G         | GGCAGCAGCGCCA<br>AAG         | TGCCCTGAATCC<br>CTAGA  | TGCCCTGAACCC<br>CTAGA   |
| rs41276922      | C          | N/A           | TCCGTTTCACCTGCAA<br>GGA       | GTAGTTGAGCTTCT<br>TGCTGTGGAT | ATGATGACATCA<br>GTGGCC | TGATGACGTCAGT<br>GGCC   |
| rs952472        | C          | N/A           | GGTGGCTATTCACAGA<br>TGCTATCAT | TGCTAGGCGTGAT<br>GCTTGAG     | ACTACAGCCTCC<br>AACTC  | ACTACAGCCTACA<br>ACTC   |
| rs3734621       | C          | N/A           | ATGGGAATCAAAGTC<br>ACTAGTTGCT | CCTCACTTGCTCTG<br>GCTTCAG    | AGCAGCCCCTAG<br>TTC    | AGCAGCCCATAGT<br>TC     |

## SUPPLEMENTARY DATA

C, custom TaqMan SNP genotyping assay; I, inventoried TaqMan SNP genotyping assay; N/A, not available.

### eQTL analysis

| <b>Gene</b>  | <b>Assay ID</b> |
|--------------|-----------------|
| <i>ACTB</i>  | Hs01060665_g1   |
| <i>B2M</i>   | Hs00984230_m1   |
| <i>GUSB</i>  | Hs99999908_m1   |
| <i>HMBS</i>  | Hs00609297_m1   |
| <i>RPL11</i> | Hs00831112_s1   |
| <i>ANPEP</i> | Hs00952641_m1   |
| <i>AP3S2</i> | Hs00195185_m1   |
| <i>ARPIN</i> | Hs01931334_s1   |
| <i>MESP1</i> | Hs00251489_m1   |
| <i>MESP2</i> | Hs02742533_m1   |
